# Supplementary material for: One-step molybdate ion assisted electrochemical synthesis of α-MoO3-decorated graphene sheets and its potential applications
Source: Royal Society of Chemistry journal article supplement (doi:10.1039/c1jm12035b), 2011-01-01
Supplement: c1jm12035b.pdf [file c1jm12035b.pdf]

## Supporting Information

### One-step molybdate ion assisted electrochemical synthesis of $\alpha$ - $\text{MoO}_3$ -decorated graphene sheets and its potential applications

Jiangbo Hu<sup>a</sup>, Anas Ramadan<sup>a</sup>, Fang Luo<sup>\*a</sup>, Bin Qi<sup>a</sup>, Xiaojiao Deng<sup>a</sup> and Ji Chen<sup>b</sup>

In this study, we performed the electrochemical exfoliation of graphite in sodium molybdate aqueous solution to obtain scale and large-area graphene sheets. Many different concentration of electrolyte for the electrochemical exfoliation, including 0.05, 0.15, 0.2 and 0.3 M, have been examined. In addition, when 0.2 M  $\text{Na}_2\text{MoO}_4$  solution was used as an electrolyte, the static potential of 5, 10 and 15 V were investigated. Based on above experimental results, it can be concluded that the static potential of 10 V exhibit ideal exfoliation efficiency when the 0.2 M  $\text{Na}_2\text{MoO}_4$  solution was used as an electrolyte.

Meanwhile, we found that the exfoliation using only  $\text{Na}_2\text{MoO}_4$  shall produce the graphene sheets with large amounts of defects as demonstrated in electrical conductivity results. The graphene sheets were possibly oxidized by  $\text{O}_2$  produced on the anode. Therefore, the reducing agent  $\text{Na}_2\text{S}_2\text{O}_4$  was added to the electrolyte solution.

From the case of exfoliation shown in **Table S1**, the following results were obtained.

**(1) Work Voltage Dependence:** If the working voltage is small ( $< 10\text{V}$ ), the exfoliation process become very slow and inefficient. When the voltage is increased to the value larger than 10 V, the exfoliation rate is too fast and large graphite particles and thick graphene layer are easily observed. Therefore working bias voltage is optimised at around 10 V.

**(2) Concentration Dependence:** If the concentration of the  $\text{Na}_2\text{MoO}_4$  electrolyte is changed from 0.05 to 0.3 M while the working voltage is fixed at 10 V, only the 0.2 M  $\text{Na}_2\text{MoO}_4$  electrolyte exhibit ideal exfoliation efficiency. When the concentration is small ( $< 0.2\text{ M}$ ), the exfoliation rate is very slow. The concentration is larger than 0.2 M, the electrolyte decomposed and exfoliation rate are fast, large graphite particles are easily observed.

**Table S1.** Summary for the electrolytes tested in our exfoliation experiments.

| Electrolyte                                                                                                | Voltage | Results                                                                           |
|------------------------------------------------------------------------------------------------------------|---------|-----------------------------------------------------------------------------------|
| Na <sub>2</sub> MoO <sub>4</sub> (0.05 M, 40 mL)                                                           | 10 V    | We can get exfoliated sheets but low yield.                                       |
| Na <sub>2</sub> MoO <sub>4</sub> (0.15 M, 40 mL)                                                           |         | We can get exfoliated sheets but low yield.                                       |
| Na <sub>2</sub> MoO <sub>4</sub> (0.2 M, 40 mL)                                                            |         | We can get large amounts of exfoliated sheets.                                    |
| Na <sub>2</sub> MoO <sub>4</sub> (0.3 M, 40 mL)                                                            |         | We can get exfoliated sheets but the exfoliation rate is fast.                    |
| Na <sub>2</sub> MoO <sub>4</sub> (0.2 M, 40 mL)                                                            | 5 V     | We can get exfoliated sheets but low yield.                                       |
|                                                                                                            | 15 V    | We can get exfoliated sheets but low yield. And the exfoliation rate is fast.     |
| Na <sub>2</sub> MoO <sub>4</sub> (0.2 M, 40 mL) +<br>Na <sub>2</sub> S <sub>2</sub> O <sub>4</sub> (1.5 g) | 5 V     | We can get exfoliated sheets but low yield.                                       |
|                                                                                                            | 10 V    | We can get large amounts of exfoliated sheets.                                    |
|                                                                                                            | 15 V    | We can get exfoliated sheets but low yield. And the exfoliation rate is too fast. |

### Measurement of electrical conductivity

The samples were pressed into a disc of 1.5 cm diameter and typically 2 mm thickness by pressing under 50 MPa at the room temperature. The electrical conductivity was recorded by SDY-V four-point probe instrument (Huayan Instrument Co., China). At least six separate locations were analyzed for each sample and the average was adopted.

### The preparation of film

The  $\alpha$ -MoO<sub>3</sub>-decorated graphene sheets were dispersed in DI water solution by gentle water-bath sonication for 30 min. To remove unwanted large graphite particles produced in the exfoliation, the suspension was subjected to centrifugation at 1500 rpm. The centrifuged suspension can be used for film preparation.

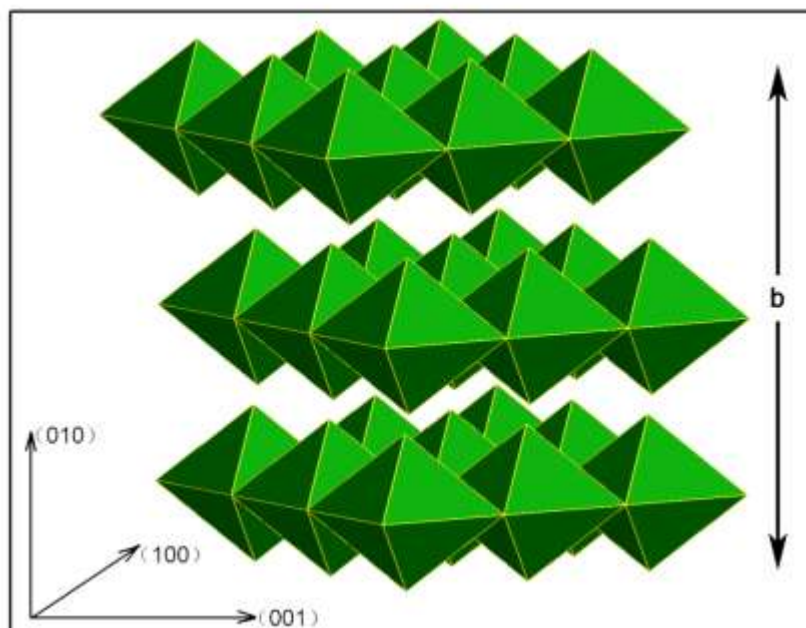

**Fig. S1** The idealized polyhedral representation of  $\alpha$ - $\text{MoO}_3$  structure (space group =  $Pbnm$ ,  $a=3.963\text{\AA}$ ,  $b=13.85\text{\AA}$ ,  $c=3.696\text{\AA}$ ).

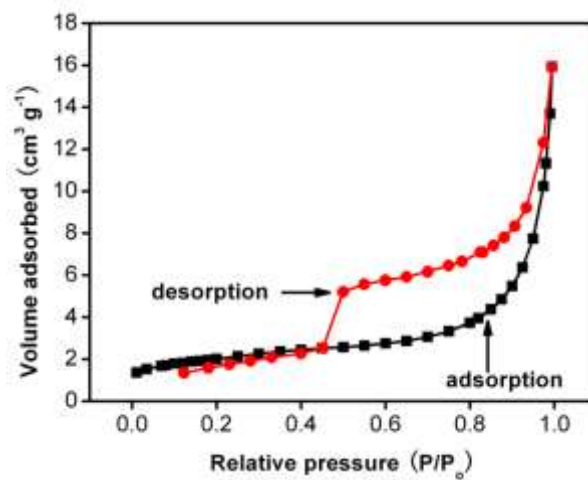

**Fig. S2** Nitrogen adsorption and desorption isotherms for MG.

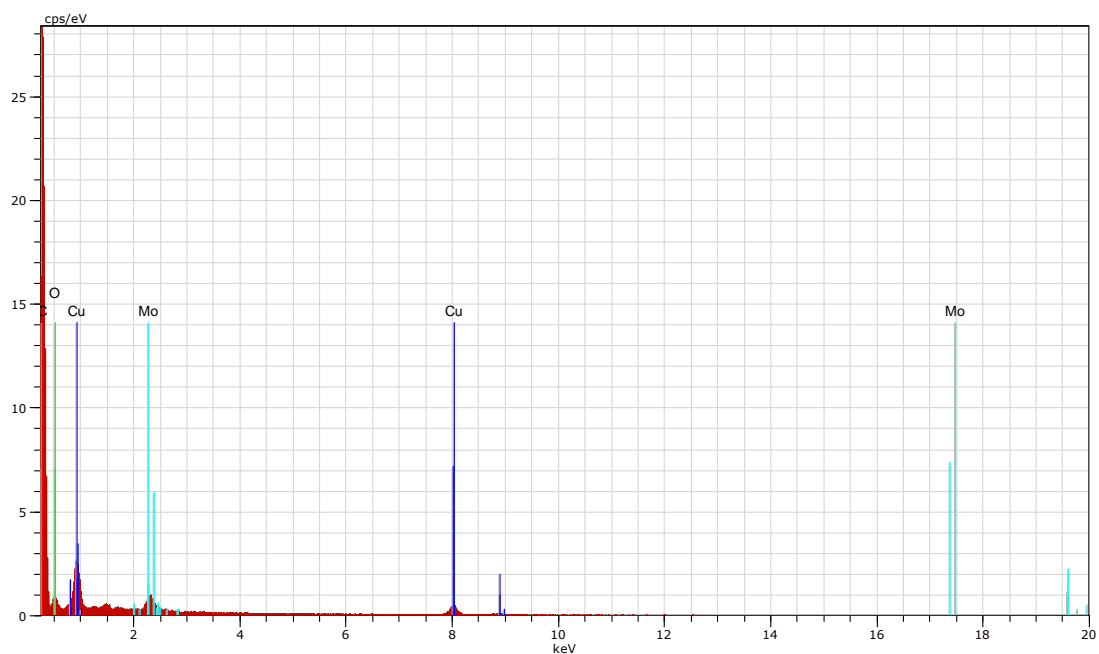

**Fig. S3** Energy dispersive spectra (EDS) of MG.

**Table S2** The data of EDS analysis of MG (HV: 20.0 kV, Puls th.: 3.91 kcps)

| EL     | AN | series    | Unn. C<br>[ wt.% ] | Norm. C<br>[ wt.% ] | Atom. C<br>[ at.% ] | Error<br>[ % ] |
|--------|----|-----------|--------------------|---------------------|---------------------|----------------|
| C      | 6  | K- series | 75.36              | 75.36               | 85.38               | 23.5           |
| O      | 8  | K- series | 15.02              | 15.02               | 12.78               | 5.3            |
| Cu     | 28 | K- series | 6.58               | 6.58                | 1.4                 | 0.2            |
| Mo     | 42 | L- series | 3.04               | 3.04                | 0.43                | 0.1            |
| Total: |    |           | 100                | 100                 | 100                 |                |

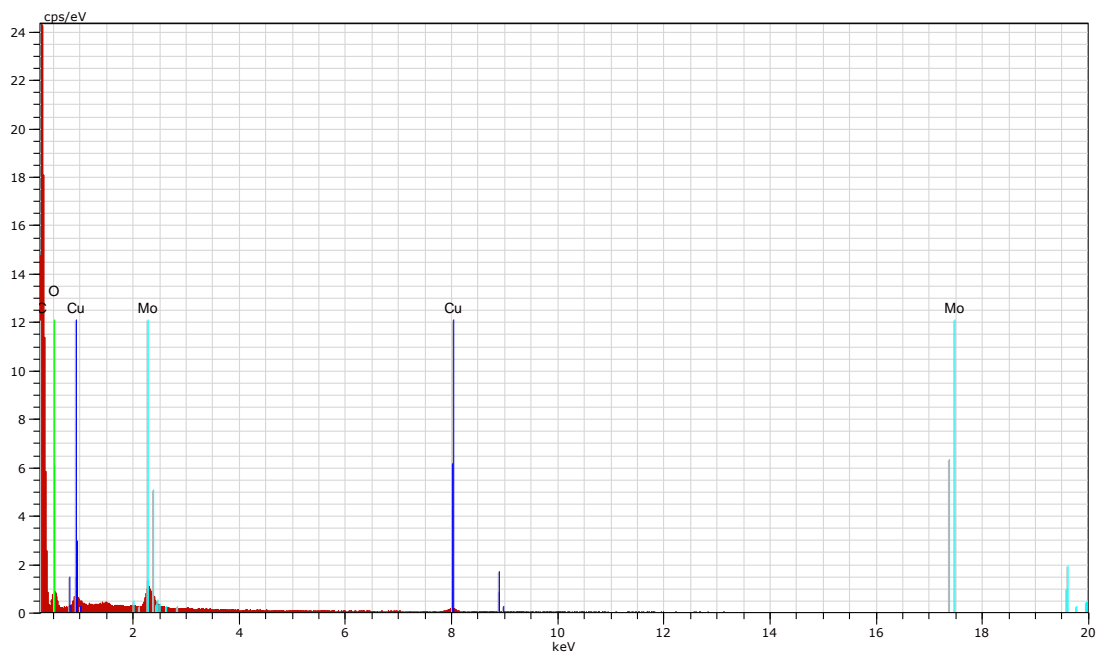

**Fig. S4** Energy dispersive spectra (EDS) of TAMG.

**Table S3** The data of EDS analysis of TAMG (HV: 20.0 kV, Puls th.: 3.16 kcps)

| EL     | AN | series    | Unn. C<br>[ wt.% ] | Norm. C<br>[ wt.% ] | Atom. C<br>[ at.% ] | Error<br>[ % ] |
|--------|----|-----------|--------------------|---------------------|---------------------|----------------|
| C      | 6  | K- series | 77.92              | 77.92               | 85.38               | 24.3           |
| O      | 8  | K- series | 16.70              | 16.70               | 13.74               | 5.9            |
| Cu     | 28 | K- series | 2.06               | 2.06                | 0.43                | 0.1            |
| Mo     | 42 | L- series | 3.32               | 3.34                | 0.46                | 0.2            |
| Total: |    |           | 100                | 100                 | 100                 |                |

**Table S4** Capacitance values of graphene based supercapacitor.

| Graphene material                                       | Discharge current density<br>( $\text{A g}^{-1}$ )<br>(Specific surface area in $\text{m}^2$<br>$\text{g}^{-1}$ ) |       | System              | Specific capacitance (F/g)<br>(electrolyte) |
|---------------------------------------------------------|-------------------------------------------------------------------------------------------------------------------|-------|---------------------|---------------------------------------------|
|                                                         |                                                                                                                   |       |                     |                                             |
| Chemically reduced graphene oxide <sup>1</sup>          | 1.3 (705)                                                                                                         |       | Two-el<br>electrode | 135 (KOH)                                   |
| Chemically reduced graphene oxide <sup>2</sup>          | 1 (---)                                                                                                           |       |                     | 154.1(Ionic liquid)                         |
| Chemically reduced graphene oxide <sup>3</sup>          | 0.1                                                                                                               | (320) |                     | 205(KOH)                                    |
| TAMG                                                    |                                                                                                                   | (9.7) |                     | 86.3(KOH)                                   |
| Graphene nanosheets/NiO <sup>4</sup>                    |                                                                                                                   | (260) |                     | 150~220(KOH)                                |
| Solvothermal reduced graphene oxide in DMF <sup>5</sup> |                                                                                                                   | (---) |                     | 276(H <sub>2</sub> SO <sub>4</sub> )        |
|                                                         |                                                                                                                   |       |                     | Three-<br>electro<br>de                     |

## References

- 1 M. D. Stoller, S. Park, Y. Zhu, J. An and R. S. Ruoff, *Nano Lett.*, 2008, **8**, 3498-3502.
- 2 C. Liu, Z. Yu, D. Neff, A. Zhamu and B. Z. Jang, *Nano Lett.*, 2010, **10**, 4863-4868.
- 3 Y. Wang, Z. Shi, Y. Huang, Y. Ma, C. Wang, M. Chen and Y. Chen, *J. Phys. Chem. C*, 2009, **113**, 13103-13107.
- 4 W. Lv, F. Sun, D. M. Tang, H. T. Fang, C. Liu, Q. H. Yang and H. M. Cheng, *J. Mater. Chem.*, 2011. DOI: 10.1039/C1JM10400D.
- 5 Z. Lin, Y. Liu, Y. Yao, O. J. Hildreth, Z. Li, K. Moon and C. P. Wong, *J. Phys. Chem. C*, 2011, **115**, 7120-7125.
